# Supplementary material
Source: PubMed Central journal article supplement (PMC4651443)

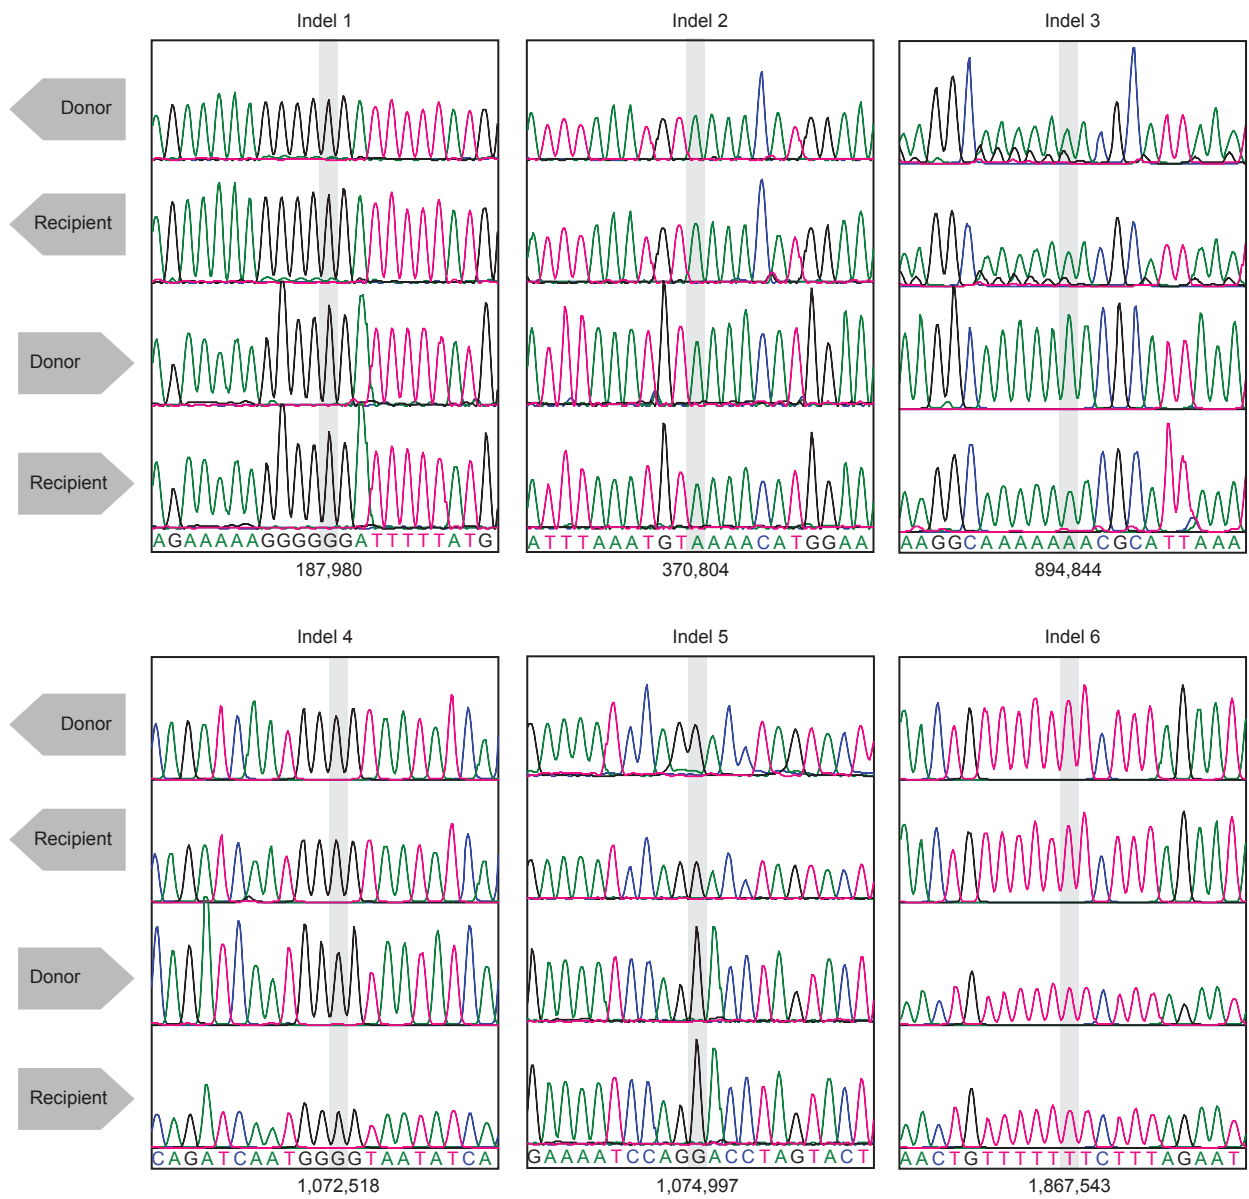

Figure S1

Supplement: NIHMS733280-supplement-Supplemental_Figure.pdf [file NIHMS733280-supplement-Supplemental_Figure.pdf]
